# Supplementary material for: Unravelling the antimicrobial action of antidepressants on gut commensal microbes
Source: PubMed Central journal article supplement (PMC7578019; doi:10.1038/s41598-020-74934-9), 2020-10-21
Supplement: 41598_2020_74934_MOESM1_ESM.pdf [file 41598_2020_74934_MOESM1_ESM.pdf]

Supplementary file:

## **Unravelling the antimicrobial action of antidepressants on gut commensal microbes**

**Yasmina Ait Chait<sup>1</sup>, Walid Mottawea<sup>1,2</sup>, Thomas A. Tompkins<sup>3</sup>, Riadh Hammami<sup>1\*</sup>**

<sup>1</sup>NuGut Research Platform, School of Nutrition Sciences, Faculty of Health Sciences, University of Ottawa, Ottawa, Ontario, K1N 6N5, Canada.

<sup>2</sup>Department of Microbiology and Immunology, Faculty of Pharmacy, Mansoura University, Mansoura, Egypt.

<sup>3</sup>Rosell Institute for Microbiome and Probiotics, Montreal, Quebec, H4P 2R2, Canada.

\*Corresponding author: [riadh.hammami@uottawa.ca](mailto:riadh.hammami@uottawa.ca)

**Table S1.** Selected intestinal bacterial strains for the investigation of antibacterial activity.

| <b>Bacterial intestinal strains</b>                        | <b>Culture medium</b>                                |
|------------------------------------------------------------|------------------------------------------------------|
| <i>Limosilactobacillus reuteri</i> ATCC 23272              | de Man Rogosa et Sharp (MRS)                         |
| <i>Lacticaseibacillus casei</i> ATCC 393                   | MRS                                                  |
| <i>Lacticaseibacillus rhamnosus</i> ATCC 53103             | MRS                                                  |
| <i>Bifidobacterium animalis subsp. animalis</i> ATCC 25527 | MRS                                                  |
| <i>Enterococcus faecium</i> ATCC 35667                     | MRS                                                  |
| <i>Pseudomonas aeruginosa</i> ATCC 27853                   | Brain Heart Infusion (BHI)                           |
| <i>Escherichia coli</i> ATCC 25922                         | BHI                                                  |
| <i>Akkermansia muciniphila</i> ATCC BAA-835                | BHI + 0.5% mucin                                     |
| <i>Eubacterium rectale</i> ATCC 33656                      | Fastidious Anaerobe Broth (FAB) + 0.5% yeast extract |
| <i>Faecalibacterium prausnitzii</i> ATCC 27768             | FAB + 0.5% yeast extract                             |
| <i>Bacteroides fragilis</i> ATCC 25285                     | FAB + 0.5% yeast extract                             |
| <i>Clostridium leptum</i> ATCC 29065                       | FAB + 0.5% yeast extract                             |

**Table S2.** Solvents used for psychotropics' stock solutions

| <b>Psychotropics</b> | <b>Solvent</b>    |
|----------------------|-------------------|
| Phenelzine           | Water             |
| Venlafaxine          | Dimethylsulfoxide |
| (S)-Citalopram       | Methanol          |
| Desipramine          | Water             |
| Bupropion            | Methanol          |
| Aripiprazole         | Acetic acid       |

**Table S3.** Inhibition zones diameters (mm) of some psychotropics against bacterial strains

| Strain                             | Psychotropic          | Desipramine |           |           | Aripiprazole |           |           | Phenelzine |           |           | (S)-Citalopram |           |           |
|------------------------------------|-----------------------|-------------|-----------|-----------|--------------|-----------|-----------|------------|-----------|-----------|----------------|-----------|-----------|
|                                    | Concentration (mg/ml) | 10          | 5         | 2.5       | 10           | 5         | 2.5       | 10         | 5         | 2.5       | 10             | 5         | 2.5       |
| <i>L. rhamnosus</i> ATCC 53103     |                       | 13 ± 0.22   | 10 ± 0.12 | NI        | 24 ± 0.10    | 9 ± 0.11  | NI        | 13 ± 0.12  | NI        | NI        | 9 ± 0.10       | NI        | NI        |
| <i>B. animalis</i> ATCC 25527      |                       | 25 ± 0.12   | 18 ± 0.20 | NI        | 19 ± 0.11    | 9 ± 0.11  | NI        | 12 ± 0.22  | NI        | NI        | NI             | NI        | NI        |
| <i>E. faecium</i> ATCC 35667       |                       | 14 ± 0.21   | 11 ± 0.21 | 9 ± 0.10  | 17 ± 0.12    | 12 ± 0.21 | 9 ± 0.11  | 22 ± 0.21  | 17 ± 0.12 | 9 ± 0.14  | 14 ± 0.11      | 10 ± 0.12 | NI        |
| <i>E. rectale</i> ATCC 33656       |                       | 21 ± 0.13   | 16 ± 0.11 | 10 ± 0.12 | 18 ± 0.12    | 13 ± 0.11 | 11 ± 0.21 | 12 ± 0.11  | 14 ± 0.10 | 9 ± 0.12  | 11 ± 0.12      | NI        | NI        |
| <i>F. prausnitzii</i> ATCC 27768   |                       | 22 ± 0.21   | 18 ± 0.11 | 15 ± 0.21 | 21 ± 0.10    | 17 ± 0.22 | 14 ± 0.11 | 20 ± 0.14  | 16 ± 0.11 | 13 ± 0.11 | 13 ± 0.11      | 9 ± 0.11  | NI        |
| <i>B. fragilis</i> ATCC 25285      |                       | 20 ± 0.22   | 17 ± 0.20 | 14 ± 0.11 | 19 ± 0.11    | 15 ± 0.12 | 12 ± 0.12 | 13 ± 0.21  | 9 ± 0.10  | NI        | 12 ± 0.21      | 9 ± 0.13  | NI        |
| <i>E. coli</i> ATCC 25922          |                       | 21 ± 0.12   | 18 ± 0.12 | 16 ± 0.12 | 15 ± 0.11    | 12 ± 0.12 | 9 ± 0.11  | 19 ± 0.20  | 14 ± 0.22 | 10 ± 0.22 | 16 ± 0.12      | 11 ± 0.21 | 9 ± 0.10  |
| <i>C. leptum</i> ATCC 29065        |                       | 35 ± 0.10   | 29 ± 0.11 | 22 ± 0.21 | 31 ± 0.12    | 22 ± 0.22 | 19 ± 0.21 | 17 ± 0.11  | 14 ± 0.21 | 9 ± 0.23  | 20 ± 0.11      | 15 ± 0.22 | 11 ± 0.11 |
| <i>A. muciniphila</i> ATCC BAA-835 |                       | 32 ± 0.20   | 27 ± 0.12 | 20 ± 0.23 | 30 ± 0.13    | 22 ± 0.21 | 18 ± 0.22 | 21 ± 0.12  | 13 ± 0.12 | 10 ± 0.11 | 18 ± 0.13      | 14 ± 0.14 | 9 ± 0.13  |

NI: no inhibition detected

**Table S4.** Approximate concentrations of antidepressants reaching the human colon.

| Drugs          | Preclinical/clinical (mg / day)<br>(min – max) | % reaching the colon <sup>1</sup> | Concentrations reaching the colon<br>(µg/mL) |                                 | Tested concentrations<br>(µg/mL) |
|----------------|------------------------------------------------|-----------------------------------|----------------------------------------------|---------------------------------|----------------------------------|
|                |                                                |                                   | Colon volume 1*<br>(min-max)                 | Colon volume 2**<br>(min – max) |                                  |
| Phenelzine     | 45 – 75                                        | 21                                | 727 - 1212                                   | 20-33                           | 75-800                           |
| Venlafaxine    | 75 – 225                                       | 13                                | 750 - 2250                                   | 20-61                           | 75-800                           |
| (S)-Citalopram | 20 – 60                                        | 10                                | 154 - 462                                    | 16-188                          | 75-800                           |
| Desipramine    | 25 – 300                                       | 30                                | 577 - 6923                                   | 21-94                           | 75-800                           |
| Bupropion      | 100 - 450                                      | 10                                | 769 - 3462                                   | 11-34                           | 75-800                           |
| Aripiprazole   | 10 – 30                                        | 55                                | 423 - 1269                                   | 4-13                            | 75-800                           |

<sup>1</sup>source: <https://www.drugbank.ca>

\*: Colon fluid volume = 18 mL, according to <sup>41</sup>

\*\* : Colon volume = 480 mL, according to <sup>42</sup>

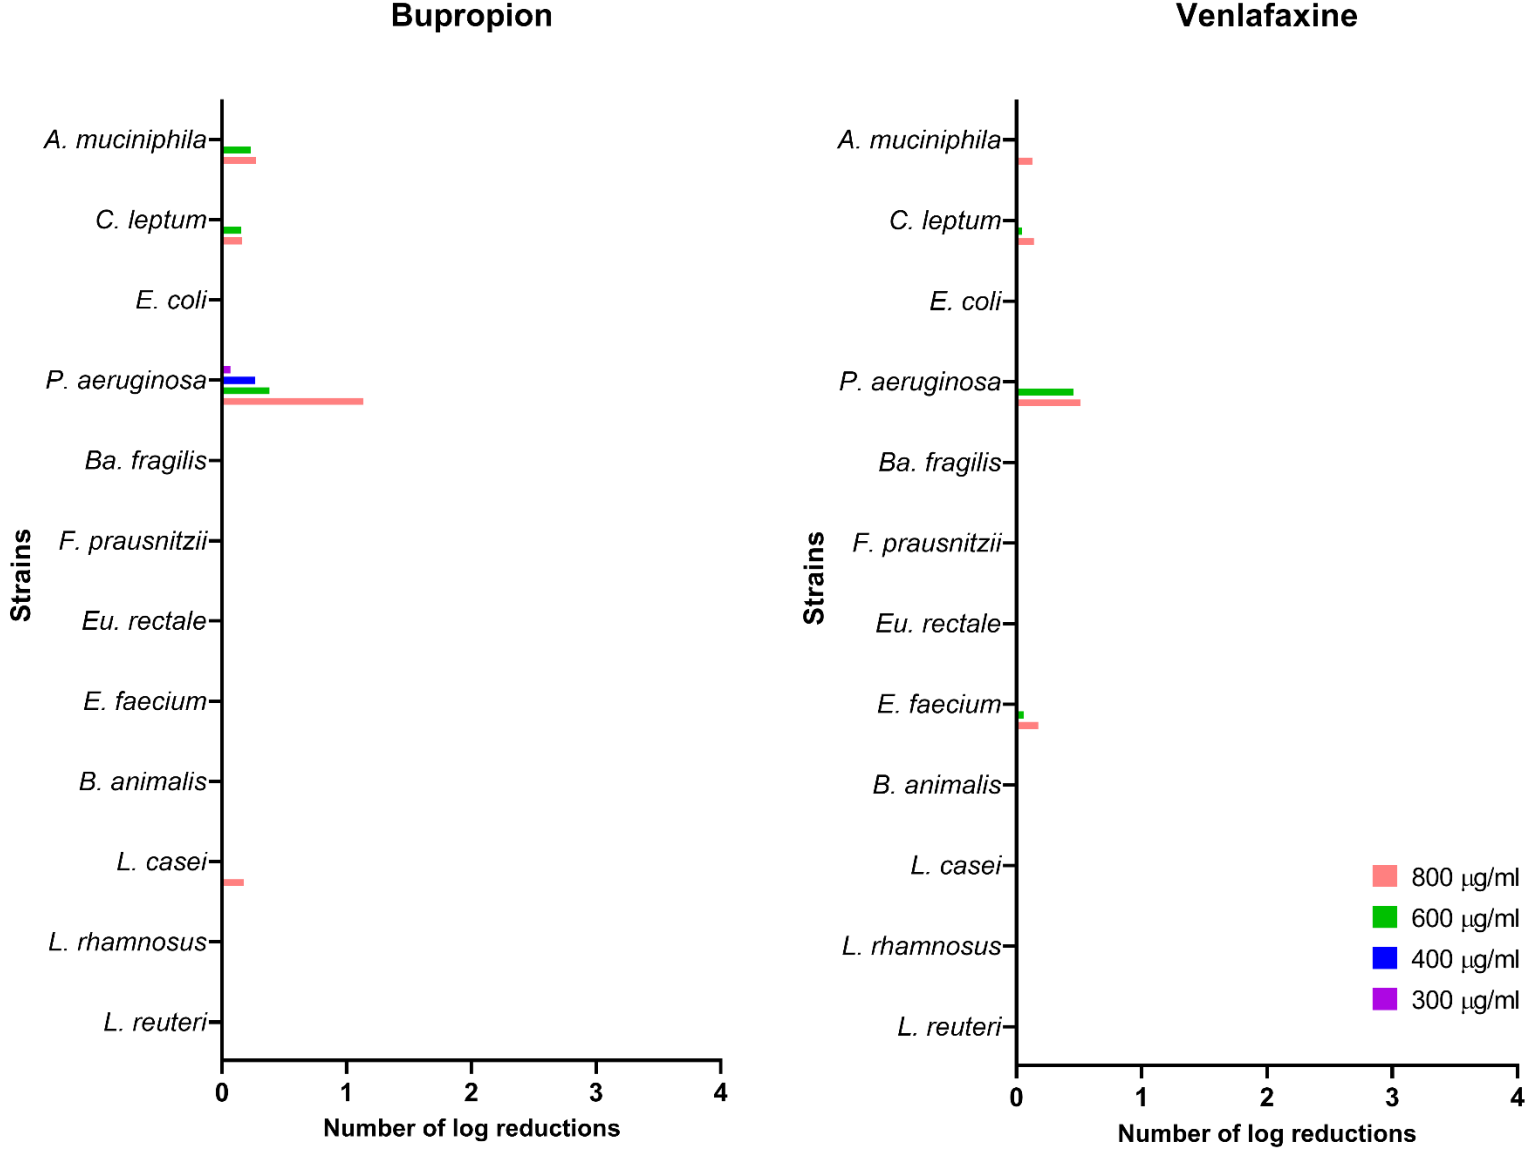

**Figure S1.** Logarithmic reductions of the growth of the commensal strains in the presence of bupropion and venlafaxine.

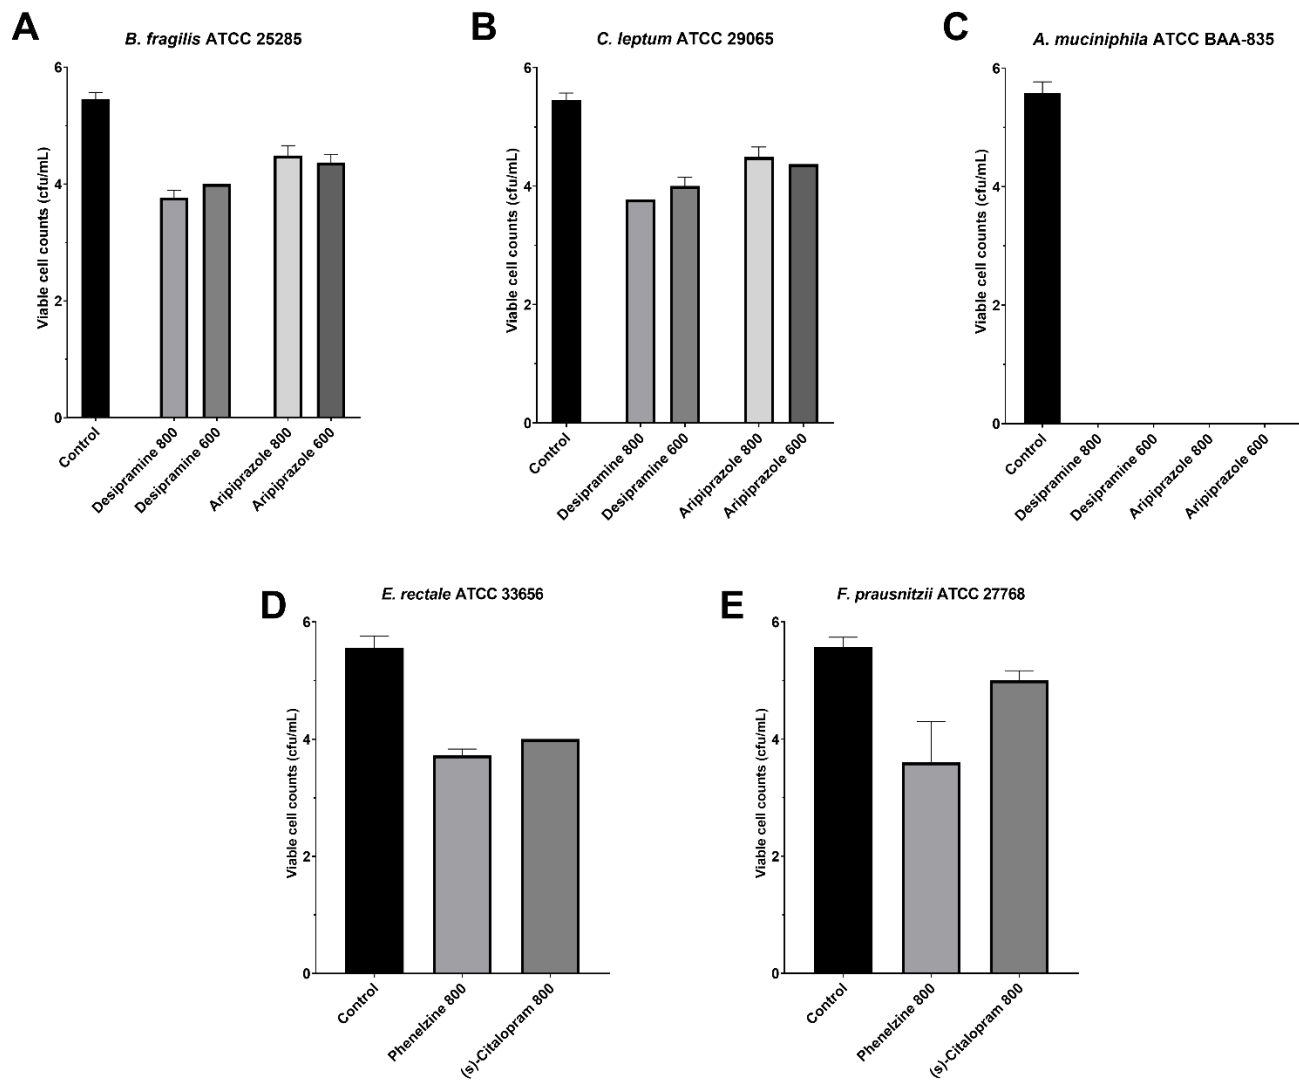

**Figure S2.** Bactericidal effect of desipramine, aripiprazole, phenelzine, and (s)-citalopram incubated for 16h at 600 and 800  $\mu\text{g/mL}$  against tested bacterial strains. All treatments were statistically significant compared to control, which corresponds to initial inoculum cell counts (cfu/mL).

## REFERENCES

41. Schiller, C. *et al.* Intestinal fluid volumes and transit of dosage forms as assessed by magnetic resonance imaging. *Aliment. Pharmacol. Ther.* **22**, 971–979 (2005).
42. Pritchard, S. E. *et al.* Fasting and postprandial volumes of the undisturbed colon: normal values and changes in diarrhea-predominant irritable bowel syndrome measured using serial MRI. *Neurogastroenterol. Motil.* **26**, 124–130 (2014).
